# Supplementary material
Source: publisher site journal article supplement (https://www.dovepress.com/article/467426)
Supplement: Supplementary file 1 [file get_supplementary_file.php]

**Supplementary material**

**Table S1:** **Maternal and Neonatal Diagnostic Test Results of Syphilis in Nanning, Guangxi Zhuang Autonomous Region (2013-2023)**

| year | Pregnant Women  (Hospital Visited) | Pregnant Women with Syphilis | Parentage of Syphilis Positive Mother (%) | Congenital syphilis cases (n) | Mother-to-Child Transmission of syphilis (%) |
| --- | --- | --- | --- | --- | --- |
| 2013 | 3811 | 2 | 0.052479664 | 1 | 50 |
| 2014 | 5004 | 3 | 0.059952038 | 2 | 66.66 |
| 2015 | 5016 | 2 | 0.039872408 | 1 | 50 |
| 2016 | 6088 | 1 | 0.016425756 | 0 | 0 |
| 2017 | 6030 | 1 | 0.016583748 | 1 | 100 |
| 2018 | 5740 | 2 | 0.034843206 | 0 | 0 |
| 2019 | 5658 | 10 | 0.176740898 | 3 | 30 |
| 2020 | 4678 | 8 | 0.171013254 | 5 | 62.5 |
| 2021 | 4280 | 7 | 0.163551402 | 0 | 0 |
| 2022 | 4065 | 10 | 0.24600246 | 1 | 10 |
| 2023 | 3678 | 8 | 0.217509516 | 2 | 20 |

**Table S2: Haematological Markers and Co-Morbidities in Infants mother Diagnosed with Syphilis**

| Sr No | WBCs(*109NDL) | Hb(gNDL) | PLT(*109NDL) | CRP(mgNDL) | PCT(ngNDml) | IL-6(pgNDml) |
| --- | --- | --- | --- | --- | --- | --- |
| 1 | 20.65 | 110 | **22** | **56.89** | 23.7 | ND |
| 2 | 8.17 | 118 | 321 | ＜5 | ND | ND |
| 3 | 13.63 | 142 | 360 | ＜5 | ND | ND |
| 4 | 22.01 | 165 | 265 | ＜5 | ND | ND |
| 5 | 21.33 | 91 | 235 | ＜5 | ND | ND |
| 6 | 15.93 | 157 | 192 | ＜5 | ND | ND |
| 7 | 7.42 | 145 | **69** | **12.71** | 0.77 | 0.57 |
| 8 | 15.01 | 171 | 277 | ＜5 | ND | ND |
| 9 | 14.23 | 181 | 330 | ＜5 | 5.3 | 33.07 |
| 10 | 8.78 | 175 | 114 | ＜5 | 0.22 | 26.14 |
| 11 | 9.71 | 182 | 114 | ＜5 | 0.09 | 50.46 |
| 12 | 23.8 | 219 | 285 | ＜5 | ND | ND |
| 13 | 15.68 | 198 | 182 | ＜5 | 0.13 | 37.75 |
| 14 | 20.43 | 188 | 322 | ＜5 | 0.07 | 21.92 |
| 15 | 14.72 | 175 | 351 | ＜5 | 0.12 | 168.3 |
| 16 | 20.1 | 181 | 397 | ＜5 | 0.14 | 87.03 |
| 17 | 14.74 | 195 | 360 | ＜5 | 0.07 | 12.39 |
| 18 | 19.89 | 182 | 261 | ＜5 | 0.11 | 39.02 |
| 19 | 12.1 | 175 | 315 | ＜5 | 0.13 | 596.5 |
| 20 | 13.7 | 180 | 227 | ＜5 | ND | ND |
| 21 | 13.49 | 198 | 268 | ＜5 | ND | ND |
| 22 | 7.37 | 171 | 155 | ＜5 | ND | ND |
| 23 | 5.86 | 174 | 203 | ＜5 | 16.48 | 35.04 |
| 24 | 9.16 | 160 | 267 | ＜5 | 0.24 | 26 |
| 25 | 9.03 | 174 | 258 | ＜5 | 0.13 | 251.6 |
| 26 | 13.93 | 180 | 285 | ＜5 | 5.29 | 13.73 |
| 27 | 9.93 | 201 | 194 | ＜5 | ND | ND |
| 28 | 12.49 | 192 | 245 | ＜5 | ND | ND |
| 29 | 14.92 | 201 | 267 | ＜5 | ND | ND |
| 30 | 7.55 | 170 | 312 | ＜5 | 0.05 | 27.51 |
| 31 | 21.81 | 161 | 334 | ＜5 | 0.13 | 2174 |
| 32 | 12.34 | 191 | 430 | ＜5 | 0.06 | 125.4 |
| 33 | 8.48 | 200 | 363 | ＜5 | 0.15 | 43.8 |
| 34 | 8.48 | 200 | 363 | ＜5 | 0.15 | 43.8 |
| 35 | 10.87 | 199 | 204 | ＜5 | ND | ND |
| 36 | 12.34 | 191 | 430 | <5 | 0.06 | 125.4 |
| 37 | 8.7 | 141 | **86** | ND | 0.09 | ND |
| 38 | 10.15 | 158 | 234 | <5 | 0.2 | ND |
| 39 | 27.89 | 181 | 214 | 6.6 | ND | ND |
| 40 | 16.21 | 149 | 272 | <5 | 0.24 | ND |
| 41 | 12.54 | 158 | 372 | ＜5 | ND | ND |
| 42 | 14.79 | 161 | 302 | ND | ND | ND |
| 43 | 13.34 | 192 | 384 | ＜5 | 0.07 | 59.83 |
| 44 | 7.33 | 156 | 244 | ND | ND | ND |
| 45 | 11.99 | 167 | 309 | ND | ND | ND |
| 46 | 11.06 | 132 | 346 | ND | ND | ND |
| 47 | 9.06 | 188 | 278 | ＜5 | ND | ND |
| 48 | 8.93 | 206 | 274 | ＜5 | ND | ND |
| 49 | 17.49 | 177 | 332 | ＜5 | ND | ND |
| 50 | **30.17** | 183 | 242 | 7.29 | 4.14 | 16.26 |
| 51 | 6.31 | 162 | 216 | ＜5 | 3.34 | 8.12 |
| 52 | 11.13 | 154 | 296 | ND | ND | ND |
| 53 | 7.49 | 135 | 180 | 6.49 | 0.17 | 28.56 |
| 54 | 7.49 | 135 | 180 | 6.49 | 0.17 | 28.56 |

**Note:** WBCs: White Blood Cell Count, the **bold** markings indicate elevated white blood cell counts; Hb: Haemoglobin; PLT: Blood Platelet Count, the **bold** markings indicate a reduced platelet count; CRP: C-reactive protein, the **bold** labelling indicates elevated CRP levels; PCT: Procalcitonin; IL-6: Interleukin-6; ND:not detected.

**Table S3: Comparison of TRUST and TPPA Test Results in Mothers**

| Sr No. | the results at the time of the mother's labour | | Infants’ results | |
| --- | --- | --- | --- | --- |
| TPPA | TRUST | TPPA | TRUST |
| 1 | 1：320 | ND | 1:320 | - |
| 2 | 1：320 | ND | 1:320 | - |
| 3 | 1：320 | 1：2 | 1:320 | 1：2 |
| 4 | - | ND | 1:320 | - |
| 5 | ND | ND | 1:160 | - |
| 6 | 1：320 | 1：2 | 1:320 | - |
| 7 | ND | ND | 1:320 | - |
| 8 | 1：320 | 1：2 | 1:320 | 1：2 |
| 9 | 1：320 | - | 1:160 | - |
| 10 | ND | ND | 1:320 | 1：1 |
| 11 | 1：320 | 1：8 | 1:320 | 1：1 |
| 12 | 1：80 | 1：2 | 1:160 | - |
| 13 | 1：320 | 1：1 | 1:320 | - |
| 14 | 1：320 | - | 1:320 | 1：1 |
| 15 | 1：320 | 1：4 | 1:320 | 1：2 |
| 16 | 1：320 | ND | 1:320 | - |
| 17 | 1：320 | 1：8 | 1:320 | 1：2 |
| 18 | 1：320 | 1：1 | 1:320 | 1：1 |
| 19 | 1：320 | 1：8 | 1:320 | 1：8 |
| 20 | 1：320 | - | 1:320 | 1：2 |
| 21 | 1：320 | 1：4 | 1:320 | 1：4 |
| 22 | 1：320 | 1：4 | 1:320 | - |
| 23 | 1：320 | ND | 1:320 | - |
| 24 | 1：320 | ND | 1:320 | - |
| 25 | 1：320 | - | 1:320 | - |
| 26 | 1：320 | 1：1 | 1:320 | - |
| 27 | 1：320 | - | 1:320 | - |
| 28 | 1：320 | - | 1:320 | - |
| 29 | 1：320 | 1：4 | 1:320 | 1：1 |
| 30 | 1：320 | - | 1:320 | - |
| 31 | 1：320 | 1：2 | 1:320 | 1：2 |
| 32 | 1：320 | - | 1:320 | - |
| 33 | 1：320 | - | 1:320 | - |
| 34 | 1：320 | - | 1:320 | - |
| 35 | - | - | - | - |
| 36 | ND | - | 1:320 | 1：2 |
| 37 | 1:320 | - | 1:320 | - |
| 38 | 1:320 | - | 1:320 | - |
| 39 | 1：320 | 1：2 | ND | - |
| 40 | 1:320 | - | 1:320 | 1：4 |
| 41 | 1:320 | 1：1 | ND | - |
| 42 | 1：160 | - | 1:80 | - |
| 43 | 1:320 | - | 1:320 | - |
| 44 | 1:320 | - | 1:320 | - |
| 45 | 1:320 | ND | 1:320 | - |
| 46 | 1:160 | - | 1:320 | - |
| 47 | 1:320 | - | 1:320 | - |
| 48 | 1:320 | - | 1:320 | - |
| 49 | 1:320 | - | 1:320 | - |
| 50 | 1:320 | - | 1:320 | - |
| 51 | 1:320 | - | 1:320 | - |
| 52 | - | - | 1:320 | - |
| 53 | 1:320 | - | - | - |
| 54 | + | 1：2 | - | - |

**Note:** TPPA: Treponema pallidum particle assay; TRUST: Toluidine red unheated serum test; +: positive; -: negatives; ND: not detected.
